# Supplementary material
Source: PubMed Central journal article supplement (PMC1383539)
Supplement: 7600958s1.pdf [file 7600958s1.pdf]

**Figure S1** Overlap between Myod/Myog targets in MDER cells and C2C12 cells. Myod and Myog targets identified in differentiated MDER cells and C2C12 myotubes differentiated for 36 h in the present study are compared with Myod and Myog targets identified in C2C12 myotubes differentiated for 96 h in a recently published study (Blais et al., 2005). Of 91 Myod targets defined in that study, 27 were either not present or present as flagged elements on our Mu13k array. Of the remaining 64 genes, 23 were called as Myod targets in the MDER cells at the 0.001 threshold, and an additional 9 genes were called as targets when the threshold was expanded to 0.01. Of 48 genes called as Myog targets in the Blais et al. study, 18 were not present or flagged on our array. Of the remaining 30 genes, 18 were called as bound at the 0.001 threshold, and an additional 4 genes were bound at the expanded 0.01 threshold. These similarities persist despite differences in cell systems, time of differentiation, choice of antibody, microarray platforms, and variance between laboratories.
