# Supplementary material
Source: PubMed Central journal article supplement (PMC1383539)
Supplement: 7600958s3.pdf [file 7600958s3.pdf]

**Table S1** Myod and Myog target genes belong to a variety of functional classes

| Symbol            | Name                                                                      | Myod | Myog |
|-------------------|---------------------------------------------------------------------------|------|------|
| <b>Adhesion</b>   |                                                                           |      |      |
| 1200003C23Rik     | RIKEN cDNA 1200003C23                                                     | x    |      |
| Itgb1             | integrin beta 1 (fibronectin receptor beta)                               | x    |      |
| Itgb1l            | integrin, beta-like 1                                                     | x    | x    |
| Lgals1            | lectin, galactose binding, soluble 1                                      |      | x    |
| Cd34 3' end       | CD34 antigen                                                              | x    |      |
| <b>Apoptosis</b>  |                                                                           |      |      |
| Acin1             | apoptotic chromatin condensation inducer 1                                | x    |      |
| Birc5             | baculoviral IAP repeat-containing 5                                       | x    |      |
| Cd5l              | CD5 antigen-like                                                          | x    | x    |
| Gadd45g           | growth arrest and DNA-damage-inducible 45 gamma                           |      | x    |
| Lsp1              | lymphocyte specific 1                                                     | x    |      |
| Pycard            | PYD and CARD domain containing                                            | x    |      |
| <b>Cell cycle</b> |                                                                           |      |      |
| <b>Akt2</b>       | thymoma viral proto-oncogene 2                                            | x    | x    |
| Calm1             | calmodulin 1                                                              |      | x    |
| <b>Cdc34</b>      | cell division cycle 34 homolog                                            | x    |      |
| Crkl              | v-crk sarcoma virus CT10 oncogene homolog (avian)-like                    | x    |      |
| Fgf7              | fibroblast growth factor 7                                                | x    | x    |
| <b>Frk</b>        | fyn-related kinase                                                        | x    | x    |
| Fyn               | protein-tyrosine kinase fyn                                               |      | x    |
| Gadd45g           | growth arrest and DNA-damage-inducible 45 gamma                           |      | x    |
| Gspt1             | G1 to phase transition 1                                                  |      | x    |
| Itgb1             | integrin beta 1 (fibronectin receptor beta)                               | x    |      |
| Mcm2              | minichromosome maintenance deficient 2 mitotin                            |      | x    |
| Mdm2              | transformed mouse 3T3 cell double minute 2                                | x    |      |
| Jund1 3' end      | jun D proto-oncogene                                                      | x    |      |
| Pycard            | PYD and CARD domain containing                                            | x    |      |
| <b>DNA repair</b> |                                                                           |      |      |
| Mus81             | MUS81 endonuclease                                                        |      | x    |
| Parp1 3' end      | ADP-ribosyltransferase (NAD+, poly (ADP-ribose) polymerase) 1             | x    | x    |
| Poli              | polymerase (DNA directed), iota                                           |      | x    |
| Rad50             | RAD50 homolog                                                             | x    |      |
| Xrcc1             | X-ray repair complementing defective repair in Chinese hamster cells 1    | x    | x    |
| <b>Metabolism</b> |                                                                           |      |      |
| 2610020H15Rik     | RIKEN cDNA 2610020H15                                                     | x    |      |
| Atp1a2            | ATPase, Na <sup>+</sup> /K <sup>+</sup> transporting, alpha 2 polypeptide | x    |      |
| Atpi              | ATPase inhibitor                                                          | x    | x    |
| Cav3              | caveolin 3                                                                | x    | x    |
| Ckm               | creatine kinase, muscle                                                   | x    | x    |

|              |                                                               |   |   |
|--------------|---------------------------------------------------------------|---|---|
| Crat         | carnitine acetyltransferase                                   |   | X |
| Cth          | cystathionase                                                 | X |   |
| Fbl          | fibrillarin                                                   | X |   |
| Fpgs         | folylpolyglutamyl synthetase                                  | X | X |
| Gaa          | glucosidase, alpha, acid                                      |   | X |
| Gns          | glucosamine (N-acetyl)-6-sulfatase                            | X |   |
| Gstm1        | glutathione S-transferase, mu 1                               | X |   |
| Hibadh       | 3-hydroxyisobutyrate dehydrogenase, mitochondrial precursor   | X |   |
| Hsd11b1      | hydroxysteroid 11-beta dehydrogenase 1                        | X |   |
| Itgb1        | integrin beta 1 (fibronectin receptor beta)                   | X |   |
| Lypla3       | lysophospholipase 3                                           | X | X |
| Mus81        | MUS81 endonuclease                                            |   | X |
| Parp1 3' end | ADP-ribosyltransferase (NAD+, poly (ADP-ribose) polymerase) 1 | X | X |
| Khk 3' end   | ketoheksokinase                                               | X | X |
| Pgam2        | phosphoglycerate mutase 2                                     | X | X |
| Pgls         | 6-phosphogluconolactonase                                     | X |   |
| Ptgds        | prostaglandin D2 synthase (brain)                             | X | X |
| Rdh9         | retinol dehydrogenase 9                                       | X |   |
| Taldo1       | transaldolase 1                                               |   | X |
| Upp2         | liver-specific uridine phosphorylase                          |   | X |

#### Micro RNAs

|                                |                               |   |   |
|--------------------------------|-------------------------------|---|---|
| mmu-mir-100 (-575 to +575)     | <i>Mus musculus</i> miR-100   | X | X |
| mmu-mir-138-2 (-2575 to -1425) | <i>Mus musculus</i> miR-138-2 | X | X |
| mmu-mir-191 (-1575 to -425)    | <i>Mus musculus</i> miR-191   | X | X |
| mmu-mir-22 (-1575 to -425)     | <i>Mus musculus</i> miR-22    | X | X |
| mmu-mir-22 (-575 to +575)      | <i>Mus musculus</i> miR-22    | X |   |

#### Mitochondrion

|               |                                                                    |   |   |
|---------------|--------------------------------------------------------------------|---|---|
| 1810044O22Rik | cytochrome b5 outer mitochondrial membrane precursor               | X | X |
| Acat1         | acetyl-Coenzyme A acetyltransferase 1 precursor                    | X |   |
| Atpi          | ATPase inhibitor                                                   | X | X |
| Chchd2        | coiled-coil-helix-coiled-coil-helix domain containing 2            | X |   |
| Cox6a2        | cytochrome c oxidase, subunit VI a, polypeptide 2                  | X |   |
| Cox8b         | cytochrome c oxidase, subunit VIIIb                                |   | X |
| Crat          | carnitine acetyltransferase                                        |   | X |
| D930010J01Rik | RIKEN cDNA D930010J01                                              | X |   |
| Dhodh         | dihydroorotate dehydrogenase                                       |   | X |
| Fpgs          | folylpolyglutamyl synthetase                                       | X | X |
| Gatm          | glycine amidinotransferase (L-arginine:glycine amidinotransferase) | X |   |
| Hibadh        | 3-hydroxyisobutyrate dehydrogenase, mitochondrial precursor        | X |   |
| Hspcb         | heat shock protein 1, beta                                         |   | X |
| Mrpl34        | mitochondrial ribosomal protein L34                                | X | X |
| Cox6a2 3' end | cytochrome c oxidase, subunit VI a, polypeptide 2                  | X |   |
| Ppox          | protoporphyrinogen oxidase                                         |   | X |

|                                    |                                                                     |   |   |
|------------------------------------|---------------------------------------------------------------------|---|---|
| Prdx3                              | peroxiredoxin 3                                                     |   | X |
| Trmt1                              | tRNA (5-methylaminomethyl-2-thiouridylate)-methyltransferase 1      | X | X |
| <b>Muscle</b>                      |                                                                     |   |   |
| Acta1                              | actin, alpha 1, skeletal muscle                                     | X | X |
| Lsp1                               | lymphocyte specific 1                                               | X |   |
| Mef2c                              | myocyte enhancer factor 2C                                          | X | X |
| Myod1                              | myogenic differentiation 1                                          | X |   |
| Myog                               | myogenin                                                            | X | X |
| Sox6                               | SRY-box containing gene 6                                           | X |   |
| Tnnc2                              | fast skeletal muscle troponin C                                     | X |   |
| Tnni2                              | troponin I, skeletal, fast 2                                        | X | X |
| Tnnt2                              | troponin T2, cardiac                                                | X | X |
| Tnnt3                              | troponin T3, skeletal, fast                                         | X | X |
| Tpm2                               | tropomyosin 2, beta                                                 | X | X |
| <b>Signaling/Receptors/Kinases</b> |                                                                     |   |   |
| 1500012D09Rik                      | RAB2B protein                                                       | X |   |
| 1700112N14Rik                      | serine/threonine kinase 36                                          |   | X |
| 5830461H18Rik                      | RIKEN cDNA 5830461H18                                               | X | X |
| Acbd3                              | acyl-Coenzyme A binding domain containing 3                         | X |   |
| Adk                                | adenosine kinase                                                    |   | X |
| Adrb2                              | adrenergic receptor, beta 2                                         | X | X |
| Agpt                               | angiopoietin 1                                                      | X | X |
| Agtrap                             | angiotensin II receptor-associated protein                          |   | X |
| Akt2                               | thymoma viral proto-oncogene 2                                      | X | X |
| Asb10                              | ankyrin repeat and SOCS box-containing protein 10                   | X | X |
| Calm1                              | calmodulin 1                                                        |   | X |
| Camk1g                             | calcium/calmodulin-dependent protein kinase I gamma                 | X |   |
| Ccrk                               | cell cycle related kinase                                           |   | X |
| Cd51                               | CD5 antigen-like                                                    | X | X |
| Chrna1                             | cholinergic receptor, nicotinic, alpha polypeptide 1 (muscle)       | X | X |
| Chrb1                              | cholinergic receptor, nicotinic, beta polypeptide 1 (muscle)        | X | X |
| Chrng                              | cholinergic receptor, nicotinic, gamma polypeptide                  | X | X |
| Ckm                                | creatine kinase, muscle                                             | X | X |
| Crkl                               | v-crk sarcoma virus CT10 oncogene homolog (avian)-like              | X |   |
| D8Wsu151e                          | Vac14 homolog                                                       | X |   |
| Eps812                             | epidermal growth factor receptor pathway substrate 8-like protein 2 | X |   |
| Fgf7                               | fibroblast growth factor 7                                          | X | X |
| Frk                                | fyn-related kinase                                                  | X | X |
| Fyn                                | protein-tyrosine kinase fyn                                         |   | X |
| Gadd45g                            | growth arrest and DNA-damage-inducible 45 gamma                     |   | X |
| Gatm                               | glycine amidinotransferase (L-arginine:glycine amidinotransferase)  | X |   |
| Il4ra                              | interleukin 4 receptor, alpha                                       |   | X |
| Il5                                | interleukin 5                                                       | X |   |

|            |                                                                                |   |   |
|------------|--------------------------------------------------------------------------------|---|---|
| Il6        | interleukin 6                                                                  | x |   |
| Itgb1      | integrin beta 1 (fibronectin receptor beta)                                    | x |   |
| Itgbl1     | integrin, beta-like 1                                                          | x | x |
| Lsp1       | lymphocyte specific 1                                                          | x |   |
| Map4k1     | mitogen activated protein kinase kinase kinase kinase 1                        | x |   |
| M6prbp1    | mannose-6-phosphate receptor binding protein 1                                 | x | x |
| Mmd        | monocyte to macrophage differentiation-associated                              |   | x |
| Mta1       | metastasis associated 1                                                        | x |   |
| Mtnr1a     | melatonin receptor 1A                                                          | x | x |
| Musk       | muscle, skeletal, receptor tyrosine kinase                                     | x |   |
| Khk 3' end | ketohehexokinase                                                               | x | x |
| Nfkb2      | nuclear factor of kappa light polypeptide gene enhancer in B-cells 2, p49/p100 | x |   |
| Nme1       | nucleoside-diphosphate kinase 1                                                |   | x |
| Pex13      | peroxisomal biogenesis factor 13                                               | x |   |
| Pnrc2      | proline-rich nuclear receptor coactivator 2                                    | x | x |
| Prkar1a    | protein kinase, cAMP dependent regulatory, type I, alpha                       | x | x |
| Ptprk      | protein tyrosine phosphatase, receptor type, K                                 | x | x |
| Rhoj       | ras homolog gene family, member J                                              | x |   |
| Rhoq       | ras homolog gene family, member Q                                              | x |   |
| Slc9a3r1   | solute carrier family 9 (sodium/hydrogen exchanger), isoform 3 regulator 1     |   | x |
| Snx15      | sorting nexin 15                                                               | x |   |
| Snx17      | sorting nexin 17                                                               |   | x |
| Stat3      | signal transducer and activator of transcription 3                             |   | x |
| Tgfbr2     | transforming growth factor, beta receptor II                                   |   | x |
| Ttk        | Ttk protein kinase                                                             | x |   |

### Structural/Cytoskeletal

|        |                                                         |   |   |
|--------|---------------------------------------------------------|---|---|
| Acta1  | actin, alpha 1, skeletal muscle                         | x | x |
| Gaa    | glucosidase, alpha, acid                                |   | x |
| Hspb7  | heat shock protein family, member 7 (cardiovascular)    | x |   |
| Indo   | indoleamine-pyrrole 2,3 dioxygenase                     | x |   |
| Lsp1   | lymphocyte specific 1                                   | x |   |
| Map4k1 | mitogen activated protein kinase kinase kinase kinase 1 | x |   |
| Mapt   | microtubule-associated protein tau                      | x |   |
| Mylc2b | myosin regulatory light chain-like                      | x | x |
| Myo10  | myosin X                                                |   | x |
| Rapsn  | receptor-associated protein of the synapse              | x |   |
| Rhoj   | ras homolog gene family, member J                       | x |   |
| Rhoq   | ras homolog gene family, member Q                       | x |   |
| Tnnc2  | fast skeletal muscle troponin C                         | x |   |
| Tnni2  | troponin I, skeletal, fast 2                            | x | x |
| Tnnt2  | troponin T2, cardiac                                    | x | x |
| Tnnt3  | troponin T3, skeletal, fast                             | x | x |
| Tpm2   | tropomyosin 2, beta                                     | x | x |

### Transport

|               |               |   |  |
|---------------|---------------|---|--|
| 1500012D09Rik | RAB2B protein | x |  |
|---------------|---------------|---|--|

|                                               |                                                                                 |   |   |
|-----------------------------------------------|---------------------------------------------------------------------------------|---|---|
| 1810044O22Rik                                 | cytochrome b5 outer mitochondrial membrane precursor                            | x | x |
| Ap3m1                                         | adaptor-related protein complex 3, mu 1 subunit                                 |   | x |
| Arl6ip5                                       | ADP-ribosylation factor-like 6 interacting protein 5                            | x | x |
| Atp1a2                                        | ATPase, Na <sup>+</sup> /K <sup>+</sup> transporting, alpha 2 polypeptide       | x |   |
| Bet1                                          | blocked early in transport 1 homolog                                            |   | x |
| Chrna1                                        | cholinergic receptor, nicotinic, alpha polypeptide 1 (muscle)                   | x | x |
| Chrnbl                                        | cholinergic receptor, nicotinic, beta polypeptide 1 (muscle)                    | x | x |
| Chrng                                         | cholinergic receptor, nicotinic, gamma polypeptide                              | x | x |
| Clcn3                                         | chloride channel 3 isoform a;chloride channel 3 isoform c                       |   | x |
| Cox6a2                                        | cytochrome c oxidase, subunit VI a, polypeptide 2                               | x |   |
| Cox8b                                         | cytochrome c oxidase, subunit VIIIb                                             |   | x |
| Crat                                          | carnitine acetyltransferase                                                     |   | x |
| Fabp3                                         | fatty acid binding protein 3, muscle and heart                                  | x |   |
| Gatm                                          | glycine amidinotransferase (L-arginine:glycine amidinotransferase)              | x |   |
| Kcnj2                                         | potassium inwardly-rectifying channel J2                                        |   | x |
| Mcoln1                                        | mucolipin 1                                                                     | x |   |
| Cox6a2 3' end                                 | cytochrome c oxidase, subunit VI a, polypeptide 2                               | x |   |
| Pex13                                         | peroxisomal biogenesis factor 13                                                | x |   |
| Ppox                                          | protoporphyrinogen oxidase                                                      |   | x |
| Ptgds                                         | prostaglandin D2 synthase (brain)                                               | x | x |
| Rad50                                         | RAD50 homolog                                                                   | x |   |
| Scamp2                                        | secretory carrier membrane protein 2                                            |   | x |
| Slc13a2                                       | solute carrier family 13 (sodium-dependent dicarboxylate transporter), member 2 | x |   |
| Snx15                                         | sorting nexin 15                                                                | x |   |
| Stx8                                          | syntaxin 8                                                                      |   | x |
| Tap2                                          | transporter 2, ATP-binding cassette, sub-family B                               | x | x |
| Tnni2                                         | troponin I, skeletal, fast 2                                                    | x | x |
| <b>Transcription and chromatin regulators</b> |                                                                                 |   |   |
| Acin1                                         | apoptotic chromatin condensation inducer 1                                      | x |   |
| Ankrd1                                        | ankyrin repeat domain 1 (cardiac muscle)                                        | x | x |
| Asb10                                         | ankyrin repeat and SOCS box-containing protein 10                               | x | x |
| Atf4                                          | activating transcription factor 4                                               | x | x |
| Crsp8                                         | transcriptional co-activator CRSP8 homolog                                      | x | x |
| D10Bwg0791e                                   | DNA segment, Chr 10, Brigham & Women's Genetics 0791 expressed                  |   | x |
| Dbp                                           | D site albumin promoter binding protein                                         | x |   |
| Dnajc1                                        | DnaJ (Hsp40) homolog, subfamily C, member 1                                     | x | x |
| Foxp1                                         | forkhead box P1                                                                 | x | x |
| Hdac9                                         | histone deacetylase 9                                                           |   | x |
| Hes6                                          | hairy and enhancer of split 6                                                   | x | x |
| <b>Idb1</b>                                   | inhibitor of DNA binding 1                                                      | x |   |
| Jmjd2c                                        | gene amplified in squamous cell carcinoma 1                                     |   | x |
| Lmx1b                                         | LIM homeobox transcription factor 1 beta                                        | x |   |
| Mcm2                                          | minichromosome maintenance deficient 2 mitotin                                  |   | x |
| Mef2c                                         | myocyte enhancer factor 2C                                                      | x | x |

|              |                                                                                     |   |   |
|--------------|-------------------------------------------------------------------------------------|---|---|
| Mllt3        | myeloid/lymphoid or mixed lineage-leukemia translocation to 3 homolog               | x |   |
| Mta1         | metastasis associated 1                                                             | x |   |
| Mtf1         | metal response element binding transcription factor 1                               |   | x |
| Myod1        | myogenic differentiation 1                                                          | x |   |
| Myog         | myogenin                                                                            | x | x |
| Myst1        | MYST histone acetyltransferase 1                                                    | x |   |
| Parp1 3' end | ADP-ribosyltransferase (NAD+, poly (ADP-ribose) polymerase) 1                       | x | x |
| Jund1 3' end | jun D proto-oncogene                                                                | x |   |
| Nfkb2        | nuclear factor of kappa light polypeptide gene enhancer in B-cells 2, p49/p100      | x |   |
| Nfkbil1      | nuclear factor of kappa light polypeptide gene enhancer in B-cells inhibitor-like 1 |   | x |
| Pbxip1       | pre-B-cell leukemia transcription factor interacting protein 1                      | x | x |
| Rpo1-3       | RNA polymerase 1-3                                                                  | x |   |
| Smyd1        | SET and MYND domain containing 1                                                    | x | x |
| Snai2        | snail homolog 2                                                                     | x | x |
| Sox6         | SRY-box containing gene 6                                                           | x |   |
| Stat3        | signal transducer and activator of transcription 3                                  |   | x |
| Taf3         | TAF3 RNA polymerase II, TATA box binding protein (TBP)-associated factor            |   | x |
| Tcf12        | transcription factor 12                                                             | x |   |
| Tead2        | TEA domain family member 2                                                          | x | x |
| Tef          | thyrotroph embryonic factor                                                         | x | x |
| Tieg1        | TGFB inducible early growth response 1                                              | x | x |
| Trim27       | tripartite motif protein 27                                                         | x |   |
| Xbp1         | X-box binding protein 1                                                             |   | x |
| Xrcc1        | X-ray repair complementing defective repair in Chinese hamster cells 1              | x | x |
| Zfp198       | zinc finger protein 198                                                             | x | x |
| Zfp238       | zinc finger protein 238                                                             | x | x |
| Zfp354b      | zinc finger protein 354B                                                            |   | x |
| Zhx1         | zinc finger and homeodomain protein 1                                               | x |   |
