# Supplementary material
Source: PubMed Central journal article supplement (PMC1383539)
Supplement: 7600958s4.pdf [file 7600958s4.pdf]

**Table S2** Genes associated with muscle development and contraction are significantly enriched among Myod and Myog targets.

| GO Term (biological process) | p-Value     | # of target genes annotated to GO term | # of target genes annotated to any GO term | # of genes on array annotated to GO term | total # of genes on array annotated to any GO term |
|------------------------------|-------------|----------------------------------------|--------------------------------------------|------------------------------------------|----------------------------------------------------|
| <b>Myod</b>                  |             |                                        |                                            |                                          |                                                    |
| muscle development           | 8.09E-06    | 13                                     | 183                                        | 78                                       | 7274                                               |
| muscle contraction           | 0.003712145 | 7                                      | 183                                        | 36                                       | 7274                                               |
| <b>Myog</b>                  |             |                                        |                                            |                                          |                                                    |
| muscle development           | 0.000919443 | 10                                     | 161                                        | 78                                       | 7274                                               |
