# Supplementary material
Source: PubMed Central journal article supplement (PMC1383539)
Supplement: 7600958s5.pdf [file 7600958s5.pdf]

**Table S3** Sequences of primers and probes used in this study.

| Name             | Sequence                   |
|------------------|----------------------------|
| Itga7-L          | TGCTGGCTGGGCTGTTAGTC       |
| Itga7-R          | CGCTTGAAGAATCCCAGCTT       |
| Itga7-probe      | CACAGCAGCAGTACCAGCAAGGCCA  |
| Mylpf-L          | CGGACCCGGAGGATGTG          |
| Mylpf-R          | TGGTGCCCTTCCCTTCTG         |
| Mylpf-probe      | TCACTGGAGCCTTCAAGGTCCTGGAC |
| Tnnc2-L          | AAGAGGAACTGGCTGAGTGCTT     |
| Tnnc2-R          | GCTAGCTCCTCAGCATCAATGTAG   |
| Tnnc2-probe      | CGCATCTTTGACAGGAACGCAGACG  |
| Myh3-L           | CAATAAACTGCGGGCAAAGAC      |
| Myh3-R           | CTTGCTCACTCCTCGCTTTCA      |
| Myh3-probe       | TGACTTCACTCTTAGCCGGATGGTGG |
| Myog-L           | GTCCCAACCCAGGAGATCATT      |
| Myog-R           | GACGTAAGGGAGTGCAGATTGTG    |
| Myog-probe       | CTCGCGGCTGACCCTACAGACGC    |
| Timm17b-L        | TGTCATTGGTGGTGGAGTCT       |
| Timm17b-R        | ACTGCAAAGCTTCCCTCCAAT      |
| Timm17b-probe    | TGCTGTGAGGATCCGGGCAC       |
| Itga7-L          | TTGGGCAGAGGAGGTCAGAAGCAG   |
| Itga7-R          | ACAGAAGGGCACAAC TGGGATGGA  |
| Amy2-ChIP-probe  | CCCAGCGCCACTCGAACAGGTG     |
| Amy2-Chip-L      | TCAGATGGGAGGACTGCTATTGT    |
| Amy2-Chip-R      | GCTCACATTCCTTGGCAATATCA    |
| Myh3-ChIP-probe  | ATCCACCTGTCGCAGCCTCCGA     |
| Myh3-ChIP-L      | GGCTGGCTTCAGACTCACAGA      |
| Myh3-ChIP-R      | GGTCTATGCCTTTAGTCCCAGAAC   |
| Mylpf-ChIP-probe | ctcccttcctgggctccagctg     |
| Mylpf-ChIP-L     | acctaggtcctaacgagacttg     |
| Mylpf-ChIP-R     | GCCTCTCCTTTCTTGGAGG        |
