# Supplementary material
Source: PubMed Central journal article supplement (PMC1383539)

# Supplementary Figure 1

A

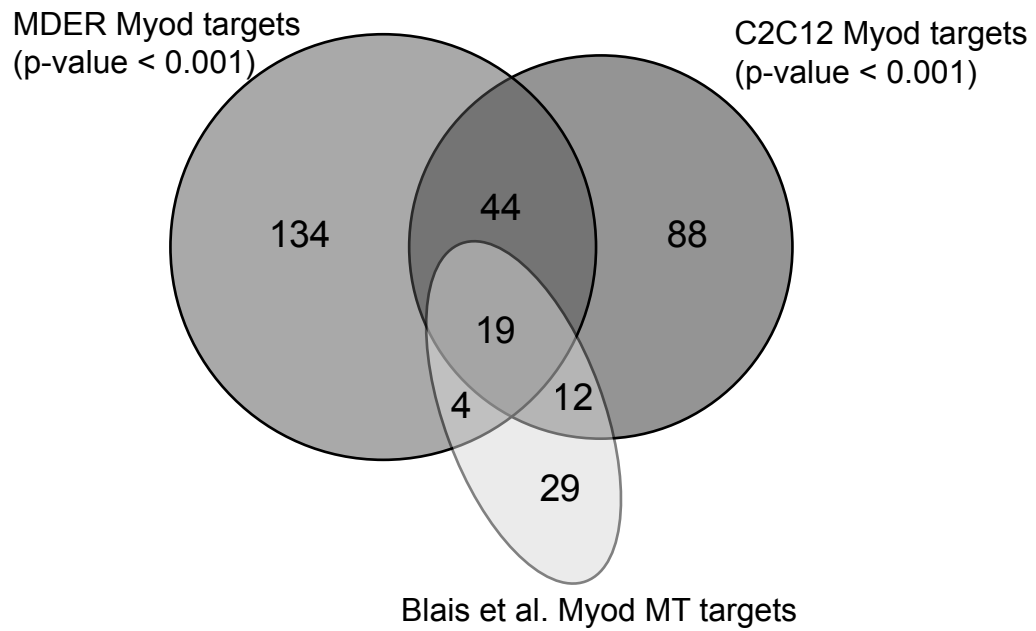

B

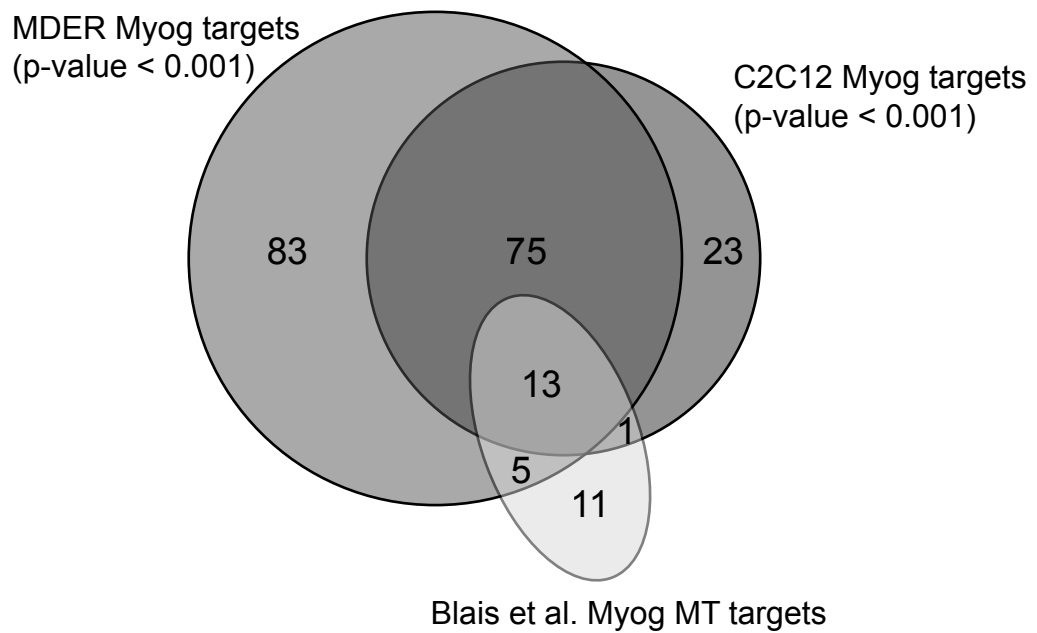

Supplement: 7600958s2.pdf [file 7600958s2.pdf]
